# Supplementary material
Source: Royal Society of Chemistry journal article supplement (doi:10.1039/d5gc06951c)
Supplement: d5gc06951c1.pdf [file d5gc06951c1.pdf]

## **Mechanochemically activating lepidolite to allow easier lithium extraction and safer thallium handling through alunite formation**

Chao Wang <sup>ab\*</sup>, Xueyan He <sup>c</sup>, Junwei Huang <sup>d</sup>, Ting Jiang <sup>d</sup>, Huimin Hu <sup>e</sup>, Qiwu

Zhang <sup>b</sup>

a Chinese Academy of Sciences, Ganjiang Innovation Academy, Ganzhou 341000, China

b School of Resources and Environmental Engineering, Wuhan University of Technology, Wuhan 430070, China

c Department of Obstetrics and Gynecology, The Sixth Hospital of Wuhan, Affiliated Hospital of Jiangnan University, No.168, Xianggang Road, Jiangnan District, Wuhan, Hubei 430015, China

d Zhengzhou Institute of Multipurpose Utilization of Mineral Resources, CAGS, Zhengzhou 450006, China

e State Environmental Protection Key Laboratory of Water Environmental Simulation and Pollution Control, South China Institute of Environmental Sciences, Ministry of Ecology and Environment, Guangzhou 510655, P.R. China

\* Corresponding author.

Chao Wang      E-mail address: [cwang@gia.cas.cn](mailto:cwang@gia.cas.cn); Tel: +86-18879738617

Chinese Academy of Sciences, Ganjiang Innovation Academy, Ganzhou 341000, China

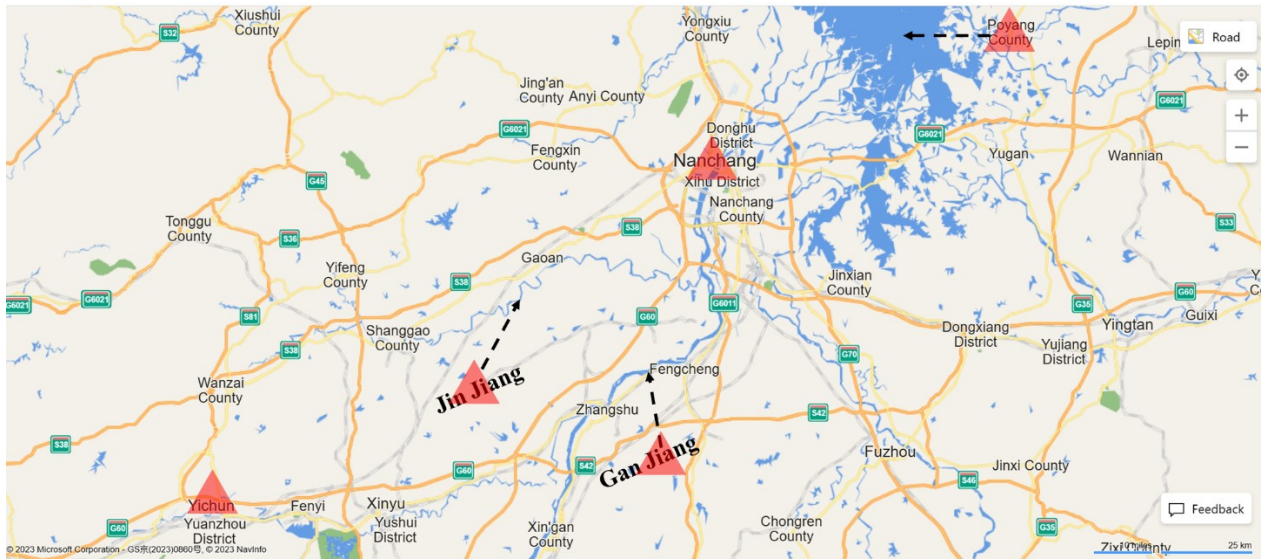

Figure. S1. Satellite Distribution Map of Jinjiang River Poyang Lake Basin (The part marked in red indicates the cities in Jiangxi Province where the Gan River and Poyang Lake are the main sources of drinking water [1, 2].)

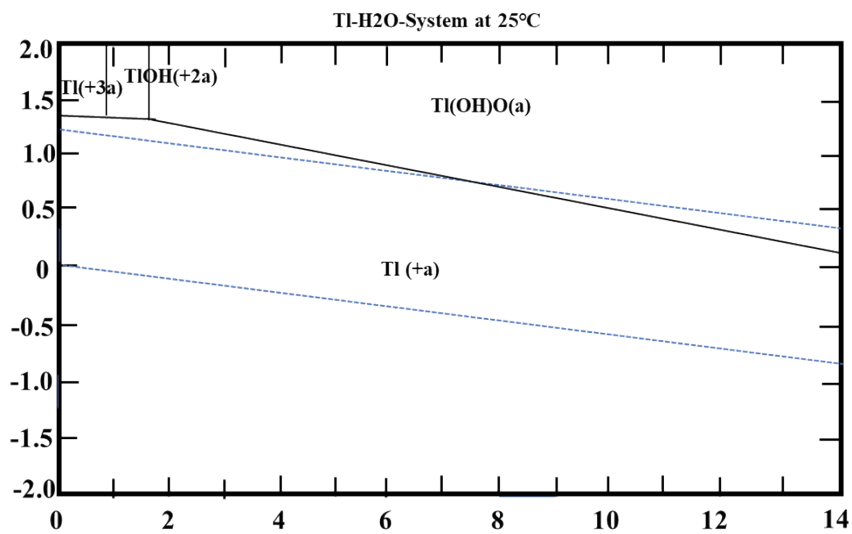

Figure. S2 Eh-pH diagram of thallium(I) in the Tl–H<sub>2</sub>O system solution.

(According to the previous literature<sup>3-5</sup>, the Eh-pH diagram (Figure. S2) shows that Tl<sup>+</sup> species dominates under most normal conditions with the pH at a range of 0–13 and the Eh at a range of – 0.85–1.35 V)

**Table. S1 The strengths and weaknesses of various approaches :**

| <b>Methods</b>                                                            | <b>Removal rate</b> | <b>initial TI<sup>+</sup> concentration</b> | <b>Mechanism</b>          | <b>Advantage</b>                     | <b>Disadvantage</b>           | <b>Reference</b>  |
|---------------------------------------------------------------------------|---------------------|---------------------------------------------|---------------------------|--------------------------------------|-------------------------------|-------------------|
| Prussian blue-Fe <sub>3</sub> O <sub>4</sub> @TRG NPs                     | 98%                 | 200 mg/L                                    | Ion-exchange              | Recyclable                           | Complex to make               | 6                 |
| Prussianblue@polytetrafluoroethylene hybrid membranes                     | 97%                 | 0.5mg/L                                     | Ion-exchange              | Greater throughput                   | expensive                     | 7                 |
| Fe <sub>3</sub> O <sub>4</sub> @TiO <sub>2</sub> decorated RGO nanosheets | 94.7%               | 8.5 mg/L                                    | Adsorption                | Recyclable                           | Complex                       | 8                 |
| Titanium dioxide interface                                                | 90.2%               | 40 mg/L                                     | Adsorption                | Recyclable                           | Introduction of contamination | 9                 |
| Poly aluminum chloride                                                    | 99.97%              | 1mg/L                                       | Adsorption                | High efficiency                      | High cost                     | 10                |
| Al can waste with amendments of Fe                                        | 98%                 | 100 μM                                      | Oxidative precipitation   | Simple procedure                     | Fe/Al ions contamination      | 10,11             |
| Fe <sup>0</sup> -PS                                                       | 98%                 | 50 mg/L                                     | Oxidative precipitation   | Suitable for industrial wastewater   | Fe contamination              | 12                |
| KMnO <sub>4</sub>                                                         | > 90%               | 30 μM                                       | Oxidative precipitation   | high efficiency                      | Mn-pollution                  | 13                |
| Bioelectricity generation                                                 | 80.5%               | 5 mg/L                                      | Electrochemical oxidation | Coupling with electricity generation | Secondary pollution           | 13                |
| S- zero-valent Mn                                                         | 97.47 ± 0.99%       | 20 mg/L                                     | Sulfidation precipitation | wide range of applications,          | Secondary S-pollution         | 14                |
| <b>Alunite structure</b>                                                  | <b>&gt; 98.5%</b>   | <b>3.5-1000 mg/L</b>                        | <b>Co-precipitation</b>   |                                      |                               | <b>This study</b> |

### **Text S1. An introduction to the activation of minerals by mechanochemical:**

The mechanochemical method refers to the application of mechanical energy by ball milling to condensed substances such as solids and liquids employing shear, abrasion, impact, and extrusion to induce changes in their structure and physicochemical properties and to induce chemical reactions <sup>15-17</sup>. In the previous research, the application of mechano-chemical activation of non-metallic minerals such as serpentine and calcite to the treatment of heavy metals in the environment has been reported.

|            |                   |                                |                  |                   |                                |       |                  |                 |
|------------|-------------------|--------------------------------|------------------|-------------------|--------------------------------|-------|------------------|-----------------|
| Components | Li <sub>2</sub> O | Al <sub>2</sub> O <sub>3</sub> | SiO <sub>2</sub> | Na <sub>2</sub> O | K <sub>2</sub> O               | CaO   | MnO <sub>2</sub> | SO <sub>2</sub> |
| (%)        | 2.22              | 27.23                          | 58.55            | 1.07              | 8.40                           | 0.18  | 1.33             | 0.36            |
| Components | BaO               | P <sub>2</sub> O <sub>5</sub>  | ZrO <sub>2</sub> | PbO               | Fe <sub>2</sub> O <sub>3</sub> | SrO   | SnO <sub>2</sub> | Total           |
| (%)        | 0.013             | 0.063                          | 0.030            | 0.018             | 0.075                          | 0.030 | 0.021            | 100%            |

Table. S2 chemical composition of the lepidolite sample

Table. S3 the characteristic particle sizes were estimated by interpolation:

| Size fraction (mm) | Mass proportion (%) | Cumulative passing (%) |
|--------------------|---------------------|------------------------|
| <0.074             | 12.26               | 12.26                  |
| 0.074–0.1          | 8.18                | 20.44                  |
| 0.1–0.15           | 38.42               | 58.86                  |
| 0.15–0.2           | 12.9                | 71.76                  |
| >0.2               | 28.24               | 100                    |

Table. S4. Particle size distribution parameters of the lepidolite sample

| Sample     | D10 (μm) | D50 (μm) | D90 (μm) |
|------------|----------|----------|----------|
| Lepidolite | 60       | 140      | 220      |

### **Text S2. Chemicals and Reagents**

All commercially available analytically pure agents acquired were not further purified.

The corresponding concentrations of the required ionic solutions were configured by

diluting the mother liquor using ultrapure water of  $18.2 \text{ M}\Omega\cdot\text{cm}$ <sup>18</sup>. The gibbsite ( $\text{Al}(\text{OH})_3$ ) is a pure chemical agent, purchased from Guangzhou Chemical Reagent Co., Ltd. (China). All the above agents were analytically pure and required no further treatment, and the solution configured in this study used deionized water as the solvent.

**S2.1  $\text{Tl}^+$  stock solutions**  $\text{Tl}^+$  stock solution (1 g/L) was prepared with  $18.2 \text{ M}\Omega\cdot\text{cm}$  of ultrapure water. Briefly, 1.304 g  $\text{TlNO}_3$  was directly dissolved in ultrapure water to gain the 1 g/L  $\text{Tl}^+$  stock solution. Store stock solution in a refrigerator at  $4^\circ\text{C}$  protected from light. The concentration  $\text{Tl}^+$  stock solutions were employed by inductively coupled plasma mass spectrometry and atomic absorption spectrum (ICP-MS and AAS)<sup>19,20</sup>.

**S2.2  $\text{Li}^+$  stock solution** 1.1 g  $\text{Li}_2\text{SO}_4$  was directly dissolved in 0.1L of ultrapure water to prepare the 10 g/L of  $\text{Li}(\text{I})$  stock solution, similarly, the  $\text{Li}(\text{I})$  stock solution was stored in a refrigerator at  $4^\circ\text{C}$ .

**S2.3  $\text{K}^+$  stock solution** 10 g/L  $\text{K}_2\text{SO}_4$  stock solution was prepared by dissolving 22.31 g  $\text{K}_2\text{SO}_4$  into 1L ultrapure water.

**S2.4 Configuration of 25 g/L  $\text{K}_2\text{SO}_4$  as masking agent** The  $\text{Li}^+$  concentration test requires the addition of 25 g/L of  $\text{K}_2\text{SO}_4$  as a masking agent for the experiment. Dissolve 2.5 g of  $\text{K}_2\text{SO}_4$  in 100 mL of deionized water to make a 25 g/L solution of masking agent. When AAS was used to test the  $\text{Li}^+$  concentration, 1 mL of 25 g/L  $\text{K}_2\text{SO}_4$  was added as a masking agent.

**S2.5 Configuration of 10 g/L  $\text{Cs}_2\text{SO}_4$  as masking agent** the  $\text{K}^+$  concentration test requires the addition of 10 g/L of  $\text{Cs}_2\text{SO}_4$  as a masking agent for the experiment. Dissolve 1.0 g of  $\text{Cs}_2\text{SO}_4$  in 100 mL of deionized water to make a 10 g/L solution of

masking agent. 1 mL 25g/L Cs<sub>2</sub>SO<sub>4</sub> was added as a masking agent for K<sup>+</sup> concentration.

**S2.6 Adjustment of the initial pH of the solution** Before the reaction, the different initial pH of the solution is regulated by 0.1 mM H<sub>2</sub>SO<sub>4</sub> as well as NaOH.

### **Text S3. Ball milling activation details**

Mechanochemical activation of gibbsite was performed on a planetary mill (Pulverisette-7, Fritsch, Germany), equipped with a pair of zirconia grinding troughs with a total volume of 45 cm<sup>3</sup> and 7 zirconia grinding balls with a diameter of 10 mm (Figure. S3a).

#### **S3.1 Activation process of lepidolite by ball milling**

2 g of lepidolite was mechanically activated in a grinding tank at different grinding speeds, and the activation time was set to 2 h.

#### **S3.2 Ball milling activation gibbsite process**

The raw gibbsite ore with a total mass of 2 g was directly injected into the grinding tank (Fig. S3b) against grinding operation with various grinding parameters<sup>21,22</sup>. It can be seen from the XRD pattern that the diffraction peaks of the gibbsite gradually become weaker as the ball milling intensity increases from 0 to 600 rpm. Specifically, according to the calculation rule of Scherrer's formula, the grain size D of the gibbsite samples decreases gradually with the increase of ball milling speed, shrinking from 57.5 nm at 0 rpm to 3.4 nm at 600 rpm, respectively, as shown in Table S3.

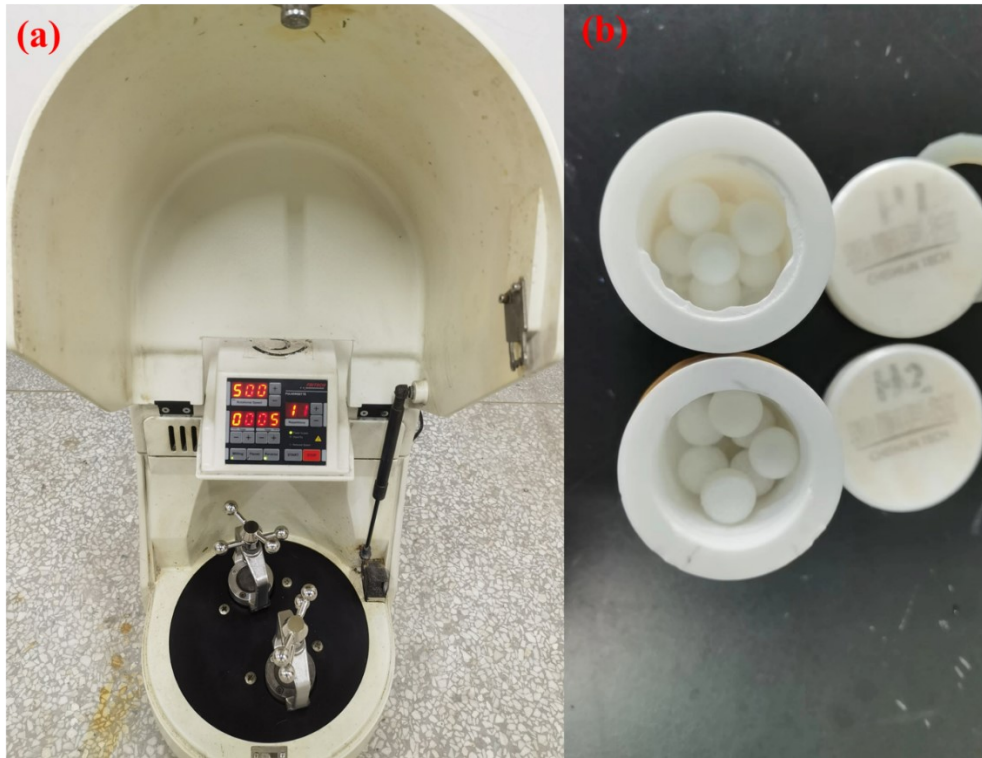

Figure. S3 (a) planetary ball mill (b) Zirconium tank

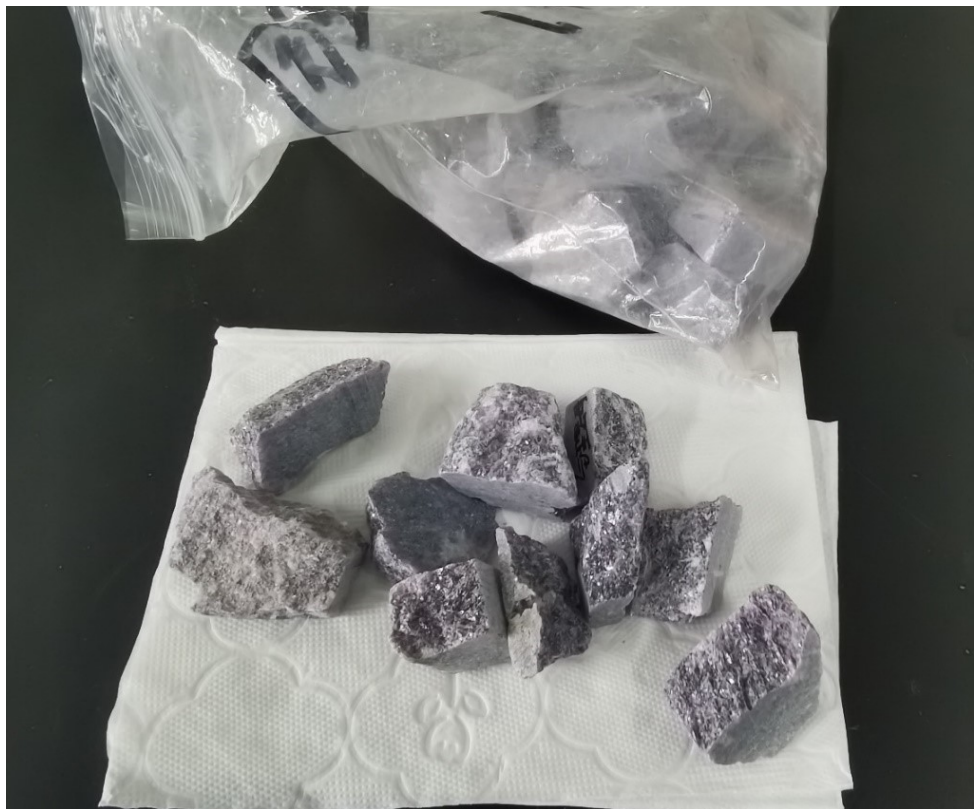

Figure. S4 the actual physical map of lepidolite ore

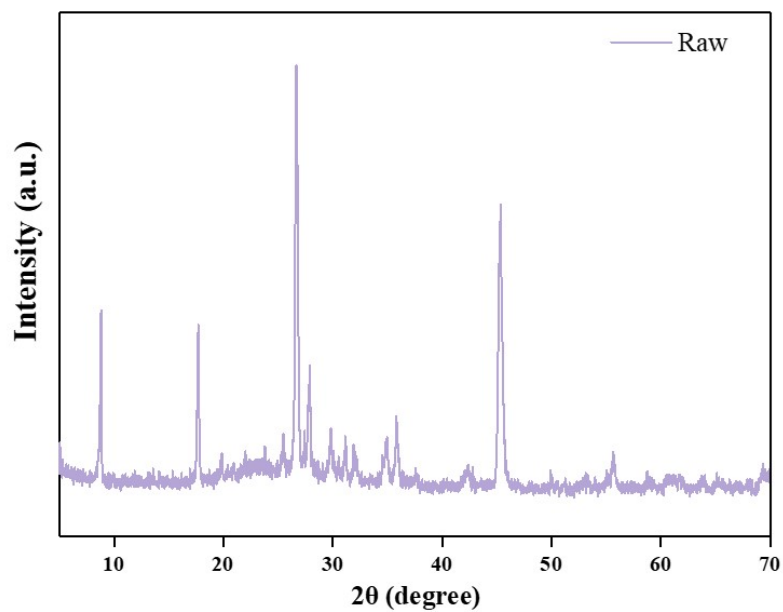

Figure. S5 XRD of actual lepidolite ore

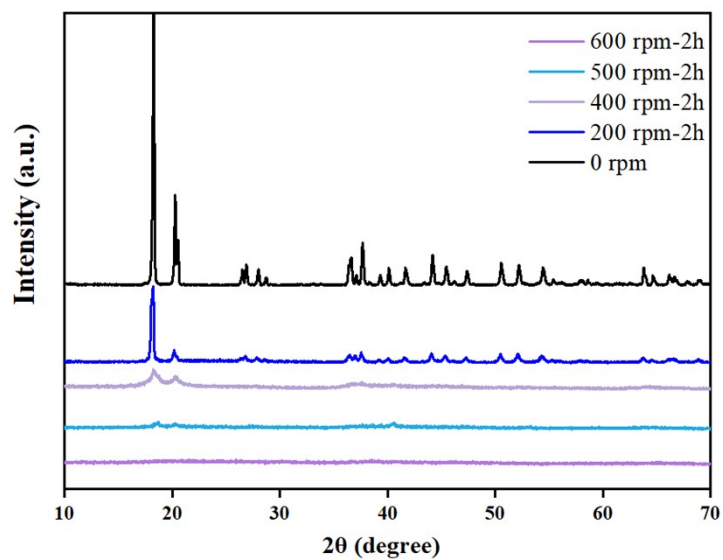

Figure. S6 XRD patterns of Gibbsite obtained under the activation of mechanochemistry ball milling (0, 200 rpm, 400 rpm, 500 rpm, 600 rpm)

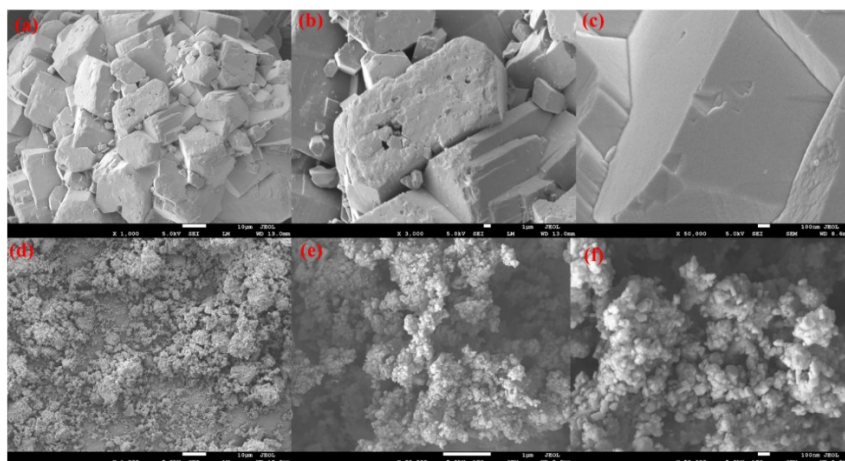

Figure. S7 Comparison of morphology analysis before and after ball milling at different scales: (a)-(c); 10  $\mu\text{m}$ , 1  $\mu\text{m}$  and 200 nm before ball milling; (d)-(f) 10  $\mu\text{m}$ , 1  $\mu\text{m}$  and 200 nm after ball milling

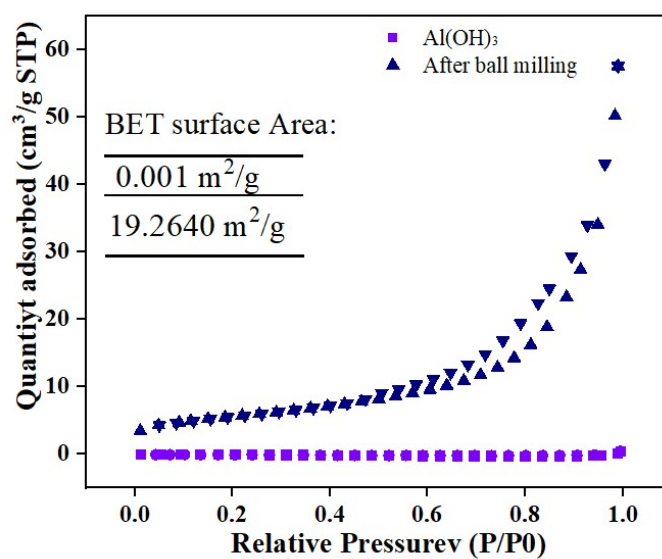

Figure. S8 Comparison of the specific surface area before and after ball milling

Table. S5  $\text{Tl}^+$  Concentrations in leachates of Various acids

| Acid concentration (%) | $\text{Tl}^+$ Concentration(ug/L) | Acid type               | $\text{Tl}^+$ Concentration (ug/L) |
|------------------------|-----------------------------------|-------------------------|------------------------------------|
| 0                      | 0.53                              | water                   | 0.53                               |
| 1                      | 21.15                             | $\text{H}_2\text{SO}_4$ | 51.13                              |
| 2                      | 42                                | $\text{HNO}_3$          | 50.15                              |
| 3                      | 48.18                             | $\text{H}_3\text{PO}_4$ | 48.28                              |
| 4                      | 51.25                             | citric                  | 47.19                              |
| 5                      | 52.21                             | acetic                  | 22.15                              |

## **Test S4 Morphological changes due to ball milling**

Figure S9 shows the morphology of the sample in different magnifications (10  $\mu\text{m}$ , 1  $\mu\text{m}$ , and 100 nm) compared with the sample obtained under the ball milling conditions at 500-2h. It can be found in Figure. S7(a)-(c) that the surface of the raw gibbsite particles is relatively smooth, showing a block structure with a large particle size. However, the morphology of the sample after ball milling (500 rpm-2h) shows a huge change, which is reflected in the significant reduction of particles, and the surface is a little rough and agglomerated with each other (Figure. S7 (d)-(f))

## **Test S5 BET changes due to ball milling**

BET was applied to further investigate the specific surface area of samples in Figure. S8. The result demonstrates that the specific surface area of the gibbsite increases from 0.001 to 19.264 after ball milling, and the greatly increased specific surface area also facilitates the subsequent immobilization of K(I).

## **Text S6. Conditions for acid leaching**

### ***S6.1 Effect of ball milling speed on acid leaching***

The lepidolite samples were activated at different ball milling speeds (0, 300 rpm, 400 rpm, 500 rpm, 600 rpm,) and then placed in 4%  $\text{H}_2\text{SO}_4$  for stirring, and the concentration of  $\text{Li}^+/\text{K}^+$  in the solution was tested by atomic absorption.

### ***S6.2 Effect of acid concentration***

The ball milling conditions were set at 500 rpm-2 h, and the lepidolite activated under these conditions was placed in 0, 1%, 2%, 3%, 4%, and 5%  $\text{H}_2\text{SO}_4$  for 24 hours of leaching. the concentration of  $\text{Li}^+/\text{K}^+$  in the solution was tested.

### ***S6.3 Effect of different acid***

According to S6.2, the ball milling conditions were set at 500-2h and the acid leaching concentration at 4%. Comparison of leaching of different acids on lepidolite, including  $\text{H}_2\text{SO}_4$ ,  $\text{HNO}_3$ ,  $\text{H}_3\text{PO}_4$ , citric acid, and acetic acid.

### ***S6.4 Effective acid leaching temperature***

The optimum acid species derived from S6.3 was citric acid, and the effect of reaction temperature on the leaching of  $\text{Li}^+/\text{K}^+$  was observed. The reaction temperatures were set to 25 °C, 45 °C, 55 °C, 65 °C and 85 °C.

### ***S6.5 Co-ground mineral species***

In actual minerals lithium mica is often associated with different other minerals, so feldspar, calcite, muscovite and quartz were ball-milled at 500 rpm-2h in a mass ratio of 1:1, respectively. The resulting co-ground samples were continued to be leached at 25 °C under 4% citric acid.

## **Text S7. Various parameters on the removal rates of $\text{K}^+$ or $\text{Tl}^+$ from modeled wastewater**

The activated  $\text{Al}(\text{OH})_3$  and  $\text{Al}_2(\text{SO}_4)_3$  were added to the mother liquor configured in 2.3.2. After reaction, the treated solution was filtered by a 0.22  $\mu\text{m}$  membrane and the residual concentration of  $\text{Tl}^+$  was determined by Atomic Absorption Spectrometry (AAS) and Inductively Coupled Plasma Mass Spectrometer (ICP-MS, ELAN 9000 Perkin Elmer, USA).

### ***S7.1 Grinding parameters***

The effects of different ball milling speed and ball milling time on activated  $\text{Al}(\text{OH})_3$ .

The  $\text{Al}(\text{OH})_3$  with a total mass of 2 g was directly injected into the grinding tank, and the grinding operation with different grinding parameters was carried out. The ball milling speed was set to 0 ~ 600, and the grinding time was set to 0 ~ 2 h.

### ***S7.2 Effect of reaction temperature***

The reaction temperatures required for the experiment are extremely demanding, and the reaction temperatures were set at 20-90 °C.

### ***S7.3 The molar ratio of $\text{Al}(\text{OH})_3:\text{Al}_2(\text{SO}_4)_3:\text{K}_2\text{SO}_4$***

The ratios of  $\text{Al}(\text{OH})_3:\text{Al}_2(\text{SO}_4)_3:\text{K}_2\text{SO}_4$  were set to different molar ratios according to the Eq. (S2). The ratios of 0:1:1, 4:1:1, 8:1:1, 12:1:1, 8:0:1, 8:1:1, 8:2:1, 8:3:1, 8:2:0, 8:2:0.5, 8:2:2, 8:2:3 and 8:2:4 appeared in Figure. 4a-4c.

### ***S7.4 Effect of initial pH***

The initial pH of the solution was adjusted to 0.86-12.6 by the  $\text{H}_2\text{SO}_4$  and NaOH in Figure. 4d.

### ***S7.5 Effect of solution volume***

The solution volume is one of the factors that affect the collision probability of each ion. The solution volume is changed to 25-400 mL (Figure. 4e) to observe the concentration changes of  $\text{Li}^+$ ,  $\text{K}^+$ , and  $\text{Tl}^+$  in the solution.

### ***S7.6 Effect of initial $\text{Tl}^+$ concentration***

The initial concentration of  $\text{Tl}^+$  required during the test was 3.5-1000 mg/L, which was diluted by the reserve solution in S2.1.

## **Test S8. X-ray absorption spectroscopy**

Data collection and extraction

X-ray absorption spectra (XAS) of the samples at Tl LIII-edge, including X-ray absorption near edge structure (XANES) and extended X-ray absorption fine structure (EXAFS), were collected at the TPS44A1 beamline at the National Synchrotron Radiation Research Centre (NSRRC) in Taiwan. XANES spectra of all samples were energy-selected at room temperature using either a Si(111) double-crystal monochromator (SNBL, DUBBLE, SAMBA) or a Si(111) channel-cut monochromator (SuperXAS monochromator (SuperXAS). Spectra of  $\text{TlNO}_3$  measured in transmission mode and used for energy calibration in terms of Se(0), which has a maximum energy value of 12658 eV for the first-order derivative of Se(0). Samples with Tl-concentrations of 0.2-1% were measured in fluorescence mode, while samples with Tl-concentrations above 1% were measured in transmission mode. The final XANES datasets of Tl sorption to 200-alunite, and 1000-alunite were recorded at the Super-XAS beamline. In addition to the XANES spectrum, the EXAFS spectrum was measured. EXAFS spectra of selected samples were recorded at 20 K using a liquid helium cryostat at the SAMBA beamline to compare changes in the coordination form of Tl in the structure. The software package Demeter was used to extract normalized XANES and EXAFS spectra for analyzing the oxidation state of Tl in selected samples by linear combination fitting (LCF) and for analyzing the local coordination role shaping of Tl in selected samples by shell fitting to the corresponding EXAFS spectra. The normalized XAS spectra were obtained by setting the edge energy  $E_0$  to 12658 eV, fitting the data in a straight line with  $E_0$  at -100 to +35 eV, and fitting a second-order polynomial to the data at the edges +35 to 120 eV in order to achieve the edge step-

normalization of  $E_0$  and the flattening of the XANES spectra.

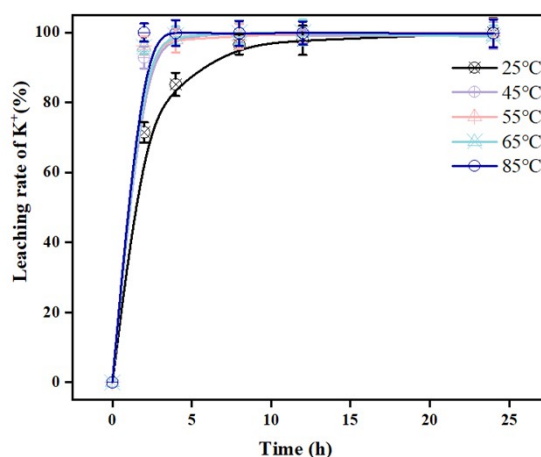

Figure. S9 Effect of temperature on  $K^+$  release from lepidolite

Table. S6: Element analysis of activated lepidolite (500 rpm-2h) after leaching in 4%  $H_2SO_4$

| Element              | Li    | Al      | Si    | Na    | K     | Ca    | Mn    | S   |
|----------------------|-------|---------|-------|-------|-------|-------|-------|-----|
|                      | 104.8 | 1436.07 | 270.7 | 74.67 | 659.7 | 19.40 | 80.11 | 7.6 |
| Concentration (mg/L) | Ba    | Sr      | As    | Fe    | Mg    | Sn    | Total |     |
|                      | 0.11  | 1.75    | 0.69  | 8.01  | 11.19 | 1.71  | 100%  |     |

Table. S7: Element analysis of activated lepidolite (500 rpm-2h) after leaching in 4% critical acid

| Element              | Li    | Al      | Si    | Na    | K      | Ca   | Mn    | S        |
|----------------------|-------|---------|-------|-------|--------|------|-------|----------|
|                      | 110.5 | 1487.53 | 74.57 | 79.38 | 762.99 | 21.1 | 80.11 | 14573.17 |
| Concentration (mg/L) | Ba    | P       | Sr    | As    | Fe     | Mg   | Sn    | Total    |
|                      | 0.065 | 22.11   | 1.78  | 0.33  | 8.5    | 11.7 | 0.33  | 100%     |

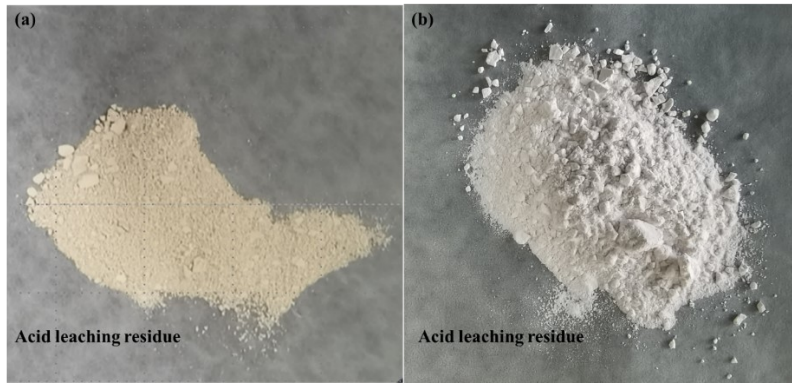

Figure. S10: Graph of products after acid leaching

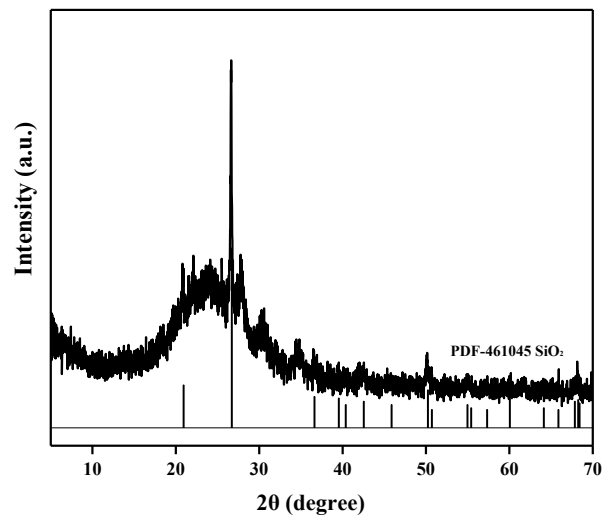

Figure. S11: XRD pattern of the product after acid leaching

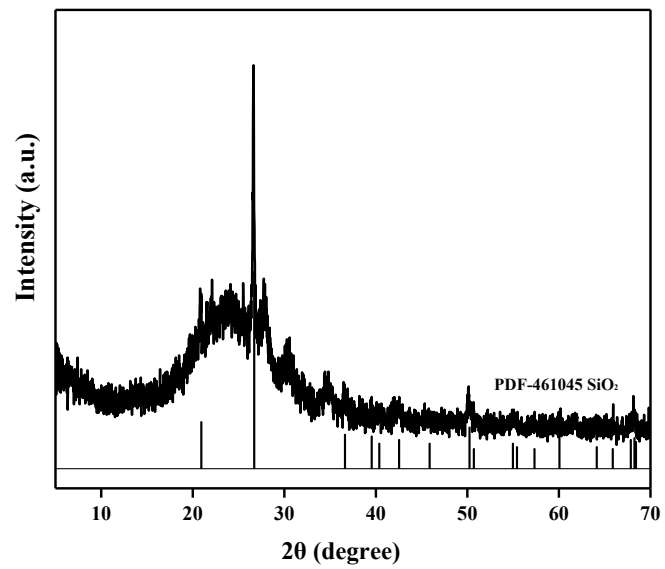

Figure. S12: XRD pattern of the product after citric acid leaching

Text S9. Cost comparison between mechanochemical leaching and conventional roasting for lepidolite processing

To provide a more comprehensive economic perspective, the cost of the mechanochemical leaching step (ball milling + 4% H<sub>2</sub>SO<sub>4</sub> leaching) was estimated and compared with that of conventional high-temperature roasting. As summarized in Table S10, the material and energy costs for the mechanochemical route are approximately \$4.08 per cubic meter of leach solution, based on an estimated energy consumption of 25 kWh/t ore and a solid-to-liquid ratio of 1:100. This cost covers the mechanical activation and dilute acid leaching steps. For conventional roasting processes, the cost structure is substantially different. High-temperature roasting (800–1000 °C) requires significant thermal energy input, typically derived from fossil fuel combustion, in addition to the use of concentrated H<sub>2</sub>SO<sub>4</sub> and subsequent off-gas treatment to capture volatile pollutants such as Tl. According to literature reports and industrial practice, the total operating cost for conventional roasting-based lithium extraction from lepidolite ranges from \$15 to \$30 per cubic meter of leach solution, depending on energy prices, acid consumption, and waste treatment requirements.

Table S8 : Cost estimation and calculation process of two methods

| Cost Factor               | Conventional Roasting                 | This Work (Projected Industrial Scale)            |
|---------------------------|---------------------------------------|---------------------------------------------------|
| Energy consumption        | 250–350 kWh/t                         | 25 kWh/t                                          |
| Energy cost (USD/t)       | \$25–35 (at \$0.10/kWh)               | \$8–12 (at \$0.10/kWh)                            |
| Acid consumption          | 30–50% H <sub>2</sub> SO <sub>4</sub> | 4% citric acid                                    |
| Acid cost (USD/t)         | \$40–80                               | \$4                                               |
| Operating temperature     | 800–1000°C                            | 25°C (room temperature)                           |
| Equipment wear            | High (high-temperature corrosion)     | Low (ZrO <sub>2</sub> media, <0.8% contamination) |
| Wastewater treatment      | High volume, complex                  | Low volume, simpler                               |
| TI volatilization control | Required (expensive)                  | Not required                                      |
| Total                     | \$45.60 /m <sup>3</sup>               | \$4.08 /m <sup>3</sup>                            |

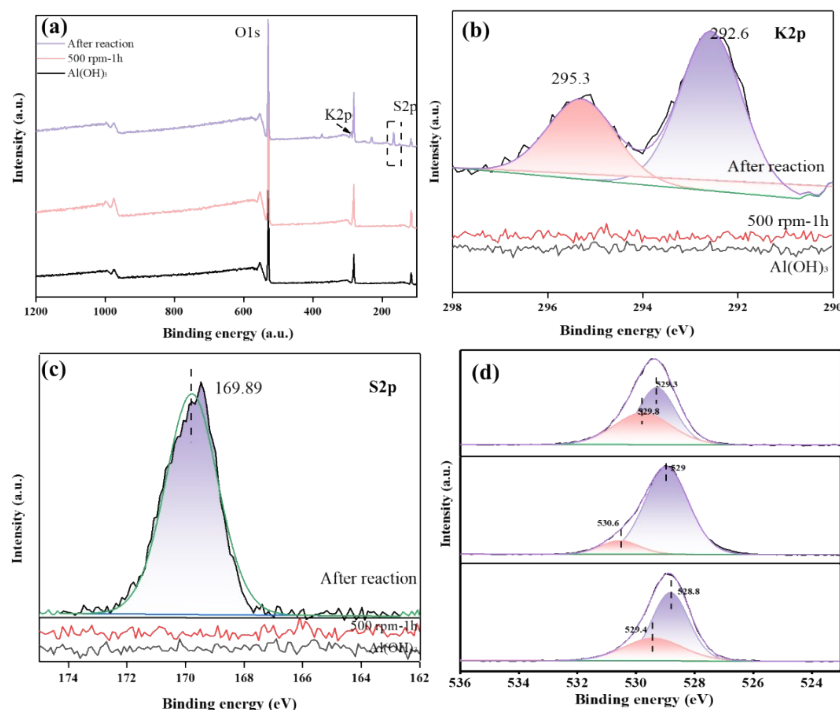

Figure. S13: XPS comparison of products (a) survey (b) K2p (c) S2p (d) O1s

## Test. S10 XPS analysis of coprecipitated products and original samples

As shown in Figure. S13, XPS spectra of the samples before and after milling and after immobilization of  $K^+$  and  $Tl^+$  were analyzed to further reveal the mechanism of  $Li^+$ - $K^+$ - $Tl^+$  separation. In the survey spectra, two new elemental signals, S2p and K2p, appeared in the samples after the reaction with  $K^+$ , showing signals of a clear shift of gibbsite to alunite after the reaction. The peaks at 295.3 eV and 292.6 eV are attributed to the K2p split, while 169.89 eV exhibits the S2p split<sup>23,24</sup>.

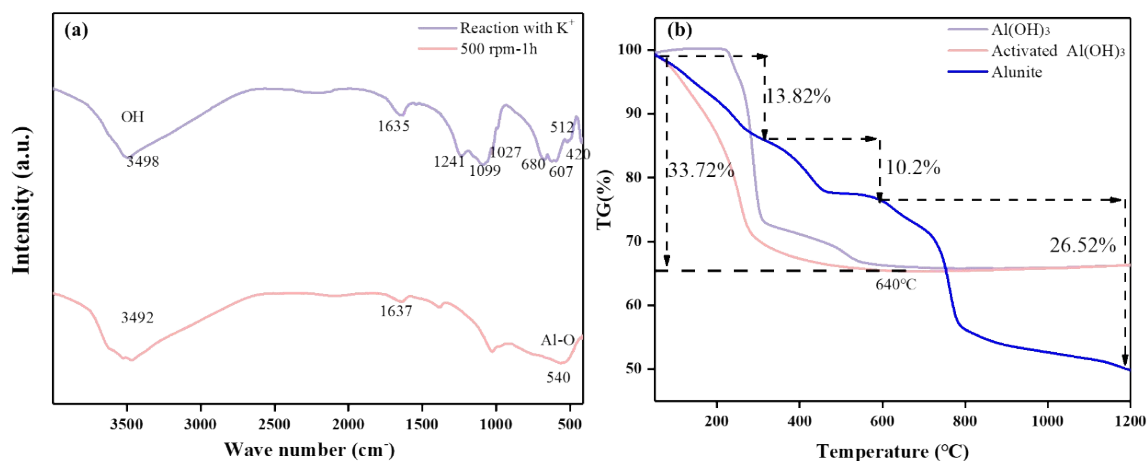

Figure. S14 characterization of  $Al(OH)_3$  before and after reaction with  $K^+/Tl^+$ .(a)FT-IR and (b)TG (reaction conditions: 500 rpm-2h, 90°C-2h)

## Test. S11 Comparison of IR and TG analyses of co-precipitated products with the original samples

Figure S14 exhibits the FTIR and TG analysis of gibbsite before and after reaction. with the  $K^+$ . The FTIR spectra of activated gibbsite and alunite slag are significantly different and the detailed variation details are given in Figure. S14a Further, the samples of gibbsite before and after ball milling and alunite precipitate were analyzed by TG-DSC

as shown in Figure. S14b. The total mass lost before and after ball milling is close to 33.72% before 640°C, and then the mass loss is almost constant due to the complete conversion of Al(OH)<sub>3</sub> to Al<sub>2</sub>O<sub>3</sub> (as shown in eq. S3), which is very close to the theoretical value, indicating that the sample of Al(OH)<sub>3</sub> are very pure and there are no other impurity phases present. Compared with the thermogravimetric results of Al(OH)<sub>3</sub>, the mass loss of the product after the reaction of gibbsite with K<sup>+</sup>/Tl<sup>+</sup> is about 13.82 % in the range of 0°C-300°C, which is because part of gibbsite is still retained in the residue. Also, the mass loss of the samples was 10.2% between 300 °C-600 °C, suggesting a loss of hydroxyl groups in alunite, whereas a larger mass loss (about 26.52%) was observed between 800°C-1200°C, which attributed to the mass loss due to decomposition of sulfate in the samples. Taken together, the results of the TG analysis of the samples agreed with the results obtained from the FT-IR analysis of the samples.

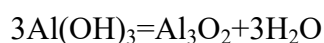

Eq. (S3)

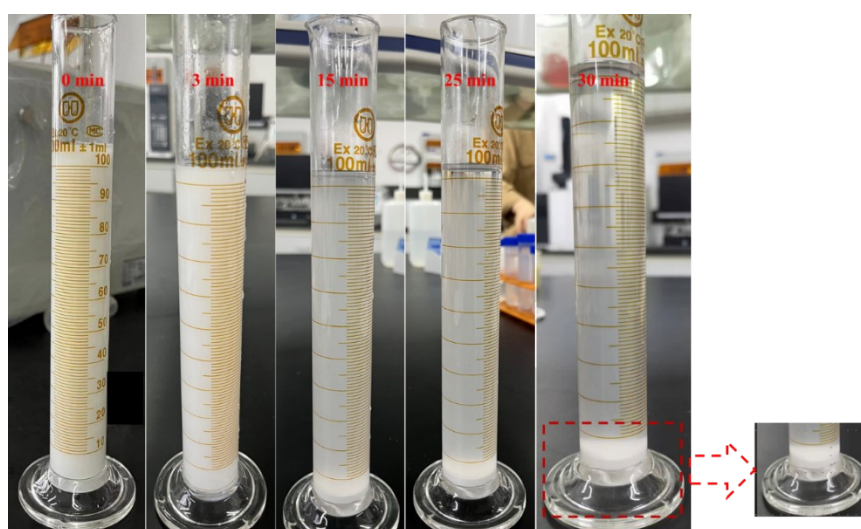

Figure. S15: Study of Sedimentation Properties

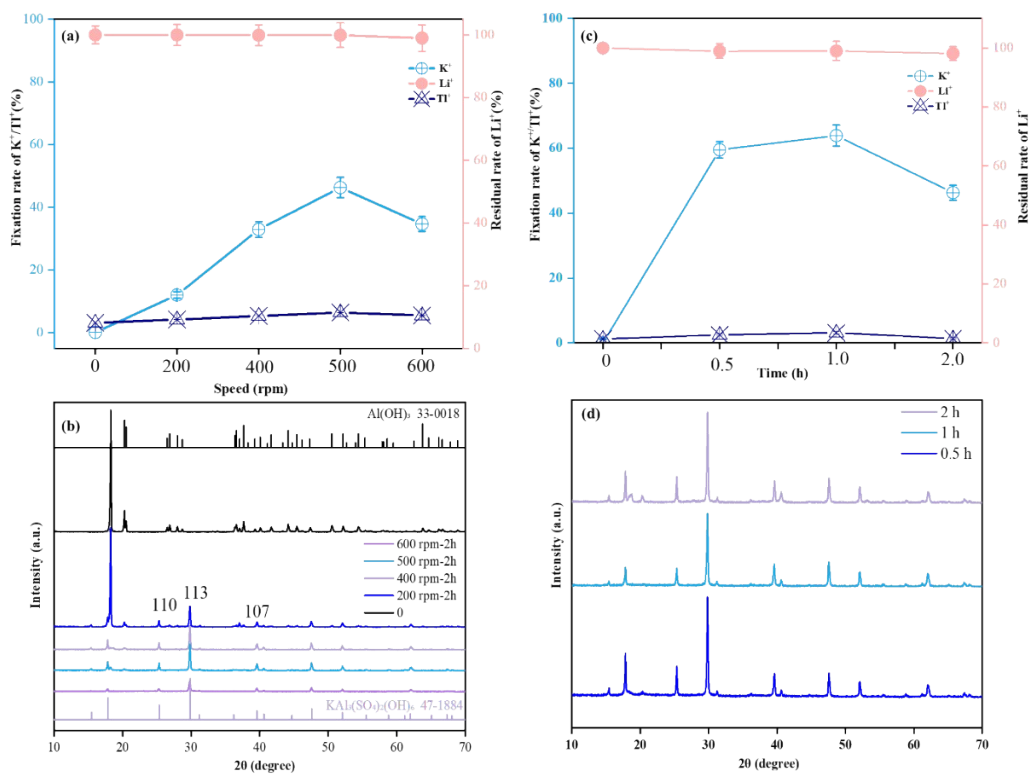

Figure S16: (a) and (b): Effect of ball milling speed on Al(OH)<sub>3</sub> and XRD pattern of the corresponding residue after the reaction; (c) and (d) Effect of ball milling time on the reaction and XRD patterns of the corresponding products (Reaction conditions: The volume of the solution is 50 mL; the molar ratio of Al(OH)<sub>3</sub>/Al<sub>2</sub>(SO<sub>4</sub>)<sub>3</sub>/K<sub>2</sub>SO<sub>4</sub> is 4:1:1)

### Test. S12: Effect of ball milling time on the reaction

Figure. S16 shows the K(I) uptake within 2h using different ball milling times (0-2h) of activated gibbsite, further confirming a relatively optimal activated time of 1h with a K(I) immobilize capacity of as high as 64.26%. Based on the above quantitative data, the XRD of the post-reaction residue was compared in Figure. S16b. The XRD patterns of the reacted samples obtained at ball milling times of 0.5 h or 1 h are almost pure phase KAl<sub>3</sub>(SO<sub>4</sub>)<sub>2</sub>(OH)<sub>2</sub>, which suggests that the reaction between activated Al(OH)<sub>3</sub>, Al<sub>2</sub>(SO<sub>4</sub>)<sub>3</sub> and K(I) is complete. Alternatively, the XRD pattern of the sample obtained at a milling time of 2h shows weak diffraction peaks on the (002) and (110) crystal

planes of  $\text{Al}(\text{OH})_3$  in addition to the phase of  $\text{KAl}_3(\text{SO}_4)_2(\text{OH})_2$ , suggesting that the activation time of 2h leads to  $\text{Al}(\text{OH})_3$  agglomeration.

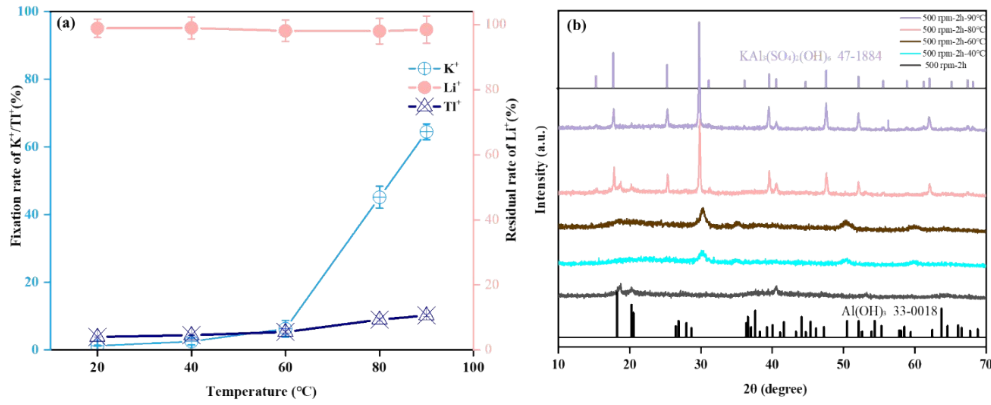

Figure. S17 Effect of reaction temperature and the XRD patterns of the corresponding products

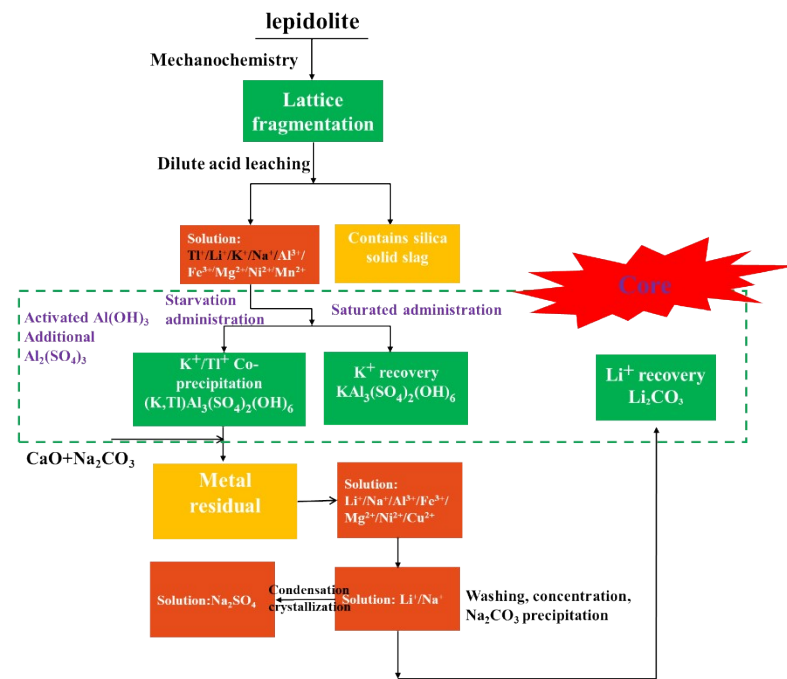

Figure. S18 Conceptual diagram of co-precipitation for  $\text{K}^+$ / $\text{Ti}^+$  removal or  $\text{K}^+$  recovery for practical applications.

### Test. 13 Definition of SI

SI is defined as  $\text{SI} = \log(\text{IAP}/\text{K}_{\text{sp}})$ , where IAP is the ion activity product and  $\text{K}_{\text{sp}}$  is the solubility product constant. A positive SI indicates supersaturation (precipitation

favorable), while a negative SI indicates undersaturation.

**Table S9. SI of alunite and Tl-alunite under different K<sup>+</sup> conditions**

| Condition                  | Molar ratio | SI (K-alunite) | SI (Tl-alunite) | Observation (removal rate)                               |
|----------------------------|-------------|----------------|-----------------|----------------------------------------------------------|
| K <sup>+</sup> -excess     | 8:2:3       | 1.8            | -0.2            | Rapid K-alunite, Tl <sup>+</sup> <15%                    |
| K <sup>+</sup> -sufficient | 8:2:2       | 1.2            | -0.1            | K-alunite, Tl <sup>+</sup> ~12-15%                       |
| Starved state              | 8:2:1       | -0.3           | +0.4            | K <sup>+</sup> and Tl <sup>+</sup> co-precipitation >98% |
| K <sup>+</sup> -absent     | 8:2:0       | -2.1           | -1.5            | No precipitation, Tl <sup>+</sup> removal <1%            |

**Text S14. Effect of coexisting ions on Tl<sup>+</sup> coprecipitation**

To evaluate the practical applicability of the alunite-based coprecipitation method, the influence of common coexisting ions (Fe<sup>3+</sup>, Na<sup>+</sup>, Mg<sup>2+</sup>, Ca<sup>2+</sup>) on Tl<sup>+</sup> removal was investigated under optimized conditions: Al(OH)<sub>3</sub>/Al<sub>2</sub>(SO<sub>4</sub>)<sub>3</sub>/K<sub>2</sub>SO<sub>4</sub> molar ratio 8:2:1, 90 °C, 2 h (Initial Tl<sup>+</sup> concentration was 5 mg/L). Competing ions were added at a concentration of 100 mg/L, which is representative of the actual leach solution composition (Table S5). After reaction, the solution was filtered through a 0.22 μm membrane, and the residual Tl<sup>+</sup> and K<sup>+</sup> concentrations were measured by ICP-MS. The results are presented in Table S10.

The data show that Na<sup>+</sup>, Mg<sup>2+</sup>, and Ca<sup>2+</sup> have negligible effects on Tl<sup>+</sup> removal, with efficiencies remaining >98%. Ferric iron shows a moderate inhibitory effect, reducing Tl<sup>+</sup> removal to approximately 85%. This is likely due to the formation of jarosite-type phases (e.g., KFe<sub>3</sub>(SO<sub>4</sub>)<sub>2</sub>(OH)<sub>6</sub>) or Fe(III) hydroxide precipitation, which compete for SO<sub>4</sub><sup>2-</sup> and Al<sup>3+</sup>. In practical applications, this can be mitigated by adjusting the reagent dosage or by pre-treatment (e.g., pH adjustment) to remove Fe<sup>3+</sup> prior to the Tl removal step.

Table S10: Effect of coexisting ions on Tl<sup>+</sup> coprecipitation

| Competing ion               | Concentration (mg/L) | Tl <sup>+</sup> removal (%) | K <sup>+</sup> removal (%) |
|-----------------------------|----------------------|-----------------------------|----------------------------|
| No competing ions (control) | -                    | 99.2 ± 0.3                  | 99.1 ± 0.4                 |
| Fe <sup>3+</sup>            | 100                  | 85.25 ± 1.2                 | 96.8 ± 0.6                 |
| Na <sup>+</sup>             | 100                  | 98.88 ± 0.4                 | 98.5 ± 0.5                 |
| Mg <sup>2+</sup>            | 100                  | 99.28 ± 0.1                 | 98.9 ± 0.4                 |
| Ca <sup>2+</sup>            | 100                  | 98.23 ± 0.5                 | 98.2 ± 0.5                 |

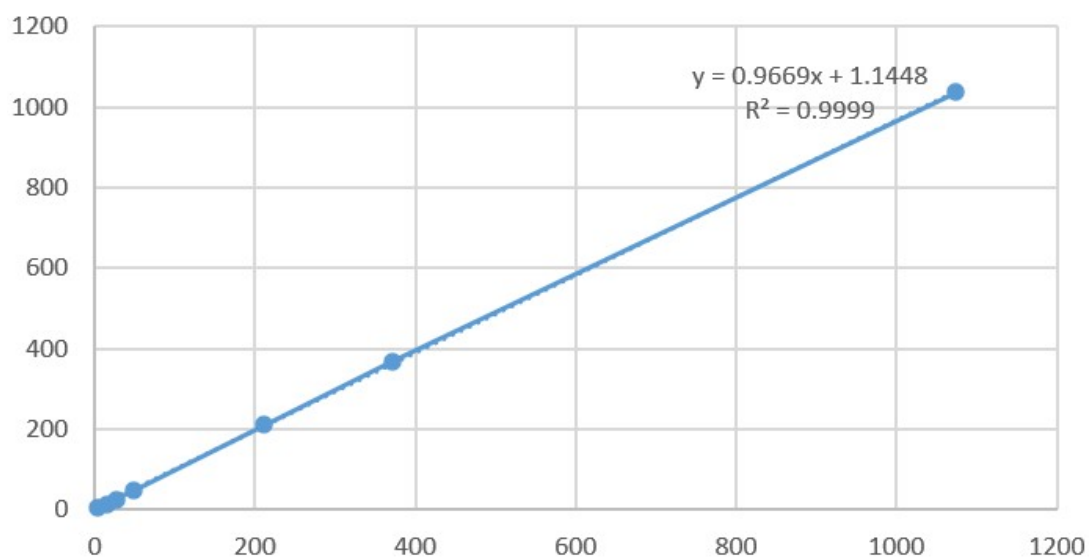

Figure. S19: linear increasing pattern with the increase of initial Tl<sup>+</sup> concentration

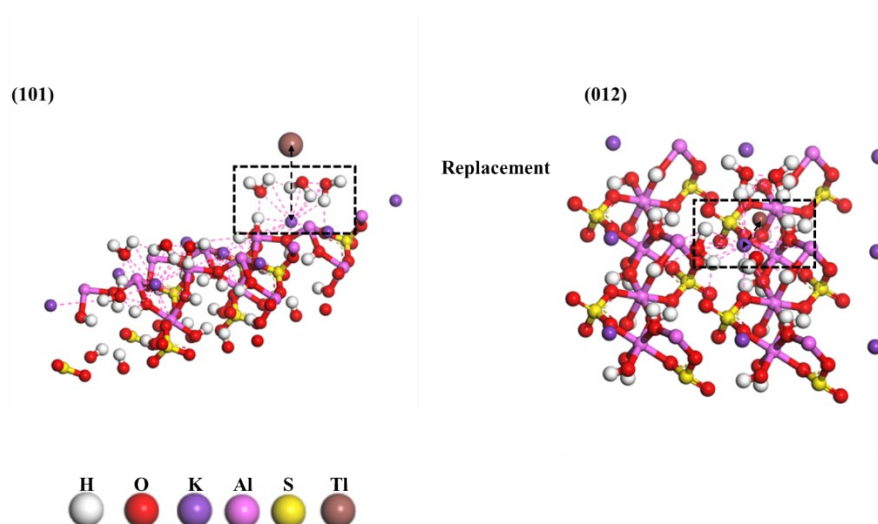

Figure. S20: Tl<sup>+</sup> substitution with K-(H<sub>2</sub>O)<sub>n</sub><sup>+</sup> at 101 and 012 crystal planes

## Test. 15 Rietveld refinement

Rietveld refinement was performed using the GSAS-II software package. The hexagonal alunite structure (space group  $R\bar{3}m^*$ , JCPDS No. 47-1884) was used as the starting model. The A-site (Wyckoff position 3a, coordinates 0,0,0) was modeled with mixed occupancy of  $K^+$  and  $Tl^+$ , while the Al, S, O, and OH sites were refined with full occupancy. Background was modeled using a Chebyshev polynomial, and peak profiles were fitted using the Thompson-Cox-Hastings function. The refinement converged with good statistics ( $R_{wp} < 10\%$ ,  $\chi^2 < 3$ ) for all samples. The refined lattice parameters and Tl occupancies are presented in Table S11. The systematic decrease in lattice parameters with increasing Tl occupancy confirms that  $Tl^+$  is incorporated into the alunite structure, substituting for  $K^+$  at the A-site. The slight reversal at the highest Tl concentration (1000 mg/L) is attributed to the coexistence of a minor poorly crystalline secondary phase ( $TlAl(SO_4)_2 \cdot 12H_2O$ ), as evidenced by Raman and XPS analyses (Fig. 4c and 4e).

Table S11. Rietveld refinement results for (K,Tl)-alunite samples

| Sample          | a (Å)     | c (Å)     | V (Å <sup>3</sup> ) | Tl occupancy (A-site) | Rwp (%) | $\chi^2$ |
|-----------------|-----------|-----------|---------------------|-----------------------|---------|----------|
| K-alunite       | 7.0212(3) | 17.483(2) | 746.8(1)            | 0                     | 8.24    | 2.12     |
| 200-Tl-alunite  | 7.0085(4) | 17.445(3) | 742.1(2)            | 0.12(2)               | 8.56    | 2.31     |
| 400-Tl-alunite  | 6.9968(5) | 17.402(4) | 737.5(3)            | 0.23(3)               | 8.89    | 2.45     |
| 1000-Tl-alunite | 7.0156(6) | 17.468(5) | 744.2(4)            | 0.19(4)               | 9.12    | 2.68     |

Table S12. Quantitative EXAFS fitting results for Tl L<sub>3</sub>-edge

| Sample          | Shell | CN     | R (Å)   | $\sigma^2$ ( $\times 10^{-3}$ Å <sup>2</sup> ) | $\Delta E_0$ (eV) | R-factor |
|-----------------|-------|--------|---------|------------------------------------------------|-------------------|----------|
| 200-Tl-alunite  | Tl-O  | 4.8(6) | 2.87(2) | 4.2(8)                                         | 1.2(5)            | 0.012    |
|                 | Tl-Al | 3.2(4) | 3.48(3) | 6.5(1.2)                                       |                   |          |
|                 | Tl-S  | 2.1(3) | 3.65(4) | 5.8(1.1)                                       |                   |          |
| 1000-Tl-alunite | Tl-O  | 4.6(5) | 2.83(2) | 5.6(1.0)                                       | 1.5(6)            | 0.018    |
|                 | Tl-Al | 2.5(4) | 3.42(3) | 7.2(1.4)                                       |                   |          |
|                 | Tl-S  | 1.6(3) | 3.58(4) | 6.9(1.3)                                       |                   |          |

### **Text S16. Cost comparison (mechanochemical leaching vs conventional roasting)**

To provide a more comprehensive economic perspective, the cost of the mechanochemical leaching step (ball milling + 4% H<sub>2</sub>SO<sub>4</sub> leaching) was estimated and compared with that of conventional high-temperature roasting. As summarized in Table S7, the material and energy costs for the mechanochemical route are approximately \$4.08 per cubic meter of leach solution, based on an estimated energy consumption of 25 kWh/t ore and a solid-to-liquid ratio of 1:100. This cost covers the mechanical activation and dilute acid leaching steps.

For conventional roasting processes, the cost structure is substantially different. High-temperature roasting (800–1000 °C) requires significant thermal energy input, typically derived from fossil fuel combustion, in addition to the use of concentrated H<sub>2</sub>SO<sub>4</sub> and subsequent off-gas treatment to capture volatile pollutants such as Tl. According to literature reports and industrial practice, the total operating cost for conventional roasting-based lithium extraction from lepidolite ranges from \$15 to \$30 per cubic meter of leach solution, depending on energy prices, acid consumption, and waste treatment requirements<sup>25,26</sup>. This estimate includes fuel costs for roasting, concentrated acid consumption, and the treatment of acidic off-gas and wastewater.

Notably, the mechanochemical route achieves lithium extraction efficiencies exceeding 99% while operating at room temperature with only 4% H<sub>2</sub>SO<sub>4</sub>, eliminating the need for high-temperature operations and concentrated acid handling. The subsequent Tl removal via alunite coprecipitation adds only approximately \$0.4/m<sup>3</sup> in chemical costs (as shown in Table S7). Therefore, the combined cost for lithium

extraction and Tl immobilization using the proposed approach remains significantly lower than the estimated cost of conventional roasting alone.

These cost estimates, together with the energy consumption comparison provided in Table S13 and Text S16, underscore the economic and environmental advantages of the mechanochemical route as a cleaner alternative for lepidolite processing.

Table. S13 Cost Estimation and Calculation Process of Various Methods

| Material/Method                              | Cost Calculation Process                                                                                                              | Estimated Cost (\$/m <sup>3</sup> ) |
|----------------------------------------------|---------------------------------------------------------------------------------------------------------------------------------------|-------------------------------------|
| Prussian blue-Fe <sub>3</sub> O <sub>4</sub> | Magnetic nanocomposite material, based on Fe <sub>3</sub> O <sub>4</sub> market price (~\$50/kg) × dosage 0.2 kg/m <sup>3</sup>       | 10                                  |
| Fe-Ti-RGO                                    | Graphene composite material, based on RGO cost (~\$100/kg) × dosage 0.1 kg/m <sup>3</sup>                                             | 10                                  |
| Poly AlCl <sub>3</sub>                       | High-efficiency poly aluminum coagulant, market price (~\$1.2/kg) × typical dosage 8 kg/m <sup>3</sup>                                | 9.6                                 |
| Al can waste-Fe                              | Recycled aluminum waste with acid dissolution cost (~\$0.3/kg) × dosage 5 kg/m <sup>3</sup>                                           | 5.5                                 |
| Fe <sup>0</sup> -PS                          | Zero-valent iron (~2/kg)×2kg+persulfate(2/kg)×2kg+persulfate(3/kg) × 1 kg                                                             | 7                                   |
| KMnO <sub>4</sub>                            | Conventional oxidant, market price (~\$1.6/kg) × typical dosage 1 kg/m <sup>3</sup>                                                   | 7.6                                 |
| <b>Alunite structure</b>                     | <b>Ball milling + 4% H<sub>2</sub>SO<sub>4</sub> leaching(25 kWh/t ore, S/L=1:100→\$4.08)+ Tl coprecipitation chemicals ( 0.4~\$)</b> | <b>4.48</b>                         |

Table. S14 Comparison of monovalent cation immobilization via the coprecipitation

| Ion                          | Ionic radius (Å) | Initial concentration (mg/L) | Fixed efficiency (%) | Precipitate phase              |
|------------------------------|------------------|------------------------------|----------------------|--------------------------------|
| NH <sub>4</sub> <sup>+</sup> | 1.43             | 50                           | 99.9 ± 0.1           | (NH <sub>4</sub> , K) -alunite |
| Cs <sup>+</sup>              | 1.67             | 50                           | 92.5 ± 0.8           | (Cs, K)-alunite                |
| Rb <sup>+</sup>              | 1.52             | 50                           | 93.5 ± 0.4           | (Rb, K)-alunite                |
| Tl <sup>+</sup> *            | 1.50             | 50                           | 99.2 ± 0.3           | (Tl, K)-alunite                |

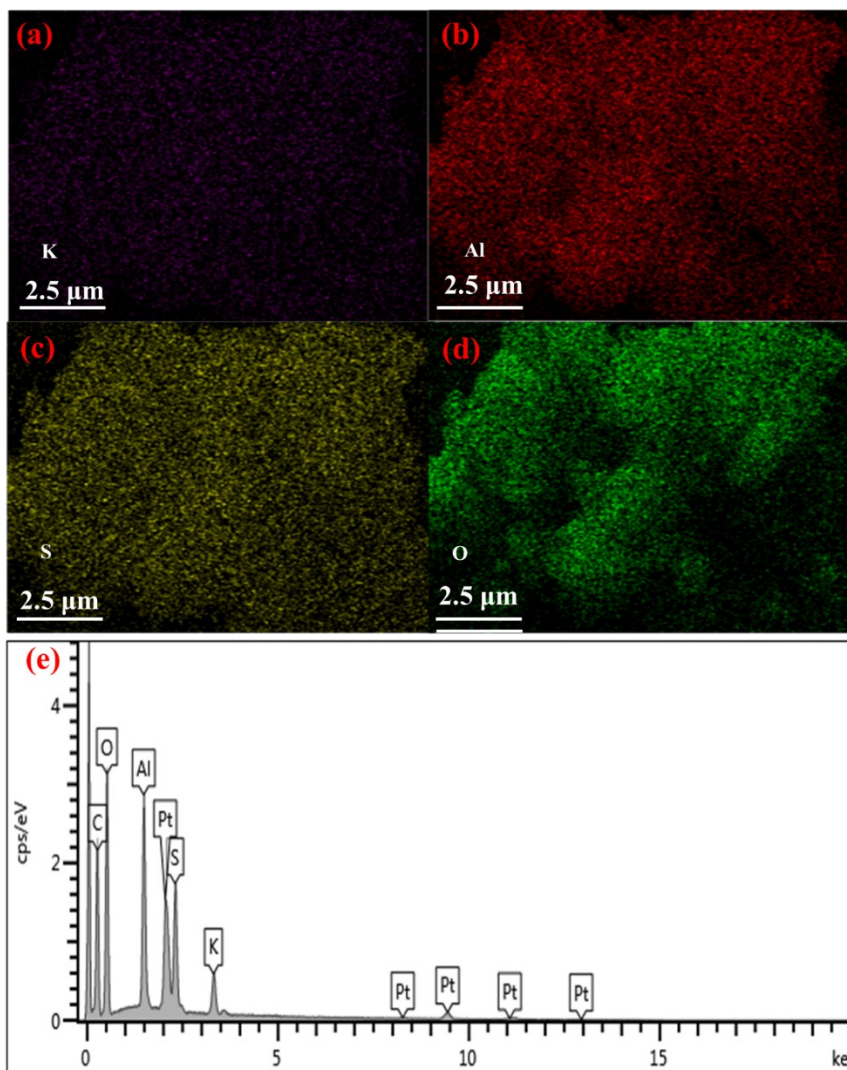

Figure. S21: The distribution of chemical elements on the surface of alunite

## References

- (1) Xu, L.; Hu, Q.; Liu, Z.; Jian, M.; Peng, Y.; Shen, R.; Liao, W.; Zhong, A. Hydrological alteration drives chemistry of dissolved organic matter in the largest freshwater lake of China (PoYang lake). *Water Research* **2024**, *251*, 121154, DOI: 10.1016/j.watres.2024.121154.
- (2) Mei, X.; Dai, Z.; Du, J.; Cheng, J. Three gorges dam enhanced organic carbon burial within the sediments of PoYang lake, china. *Catena* **2024**, *238*, 107859, DOI: 10.1016/j.catena.2024.107859.
- (3) Martin, L. A.; Wissocq, A.; Benedetti, M. F.; Latrille, C. Thallium (Tl) sorption onto illite and smectite: implications for Tl mobility in the environment. *Geochim. Cosmochim. Acta* **2018**, *230*, 1-16, DOI: <https://doi.org/10.1016/j.gca.2018.03.016>.
- (4) Shi, Z.; Zhang, P.; Li, X.; Zheng, Y.; Huang, J.; Wang, Y.; Luo, X.; Zhang, G.; Xiao, T.; Long, J.; et al. Thallium removal from wastewater using sulfidized zero-valent manganese: effects of sulfidation method and liquid nitrogen pretreatment. *Chemosphere* **2023**, *318*, 137971, DOI: <https://doi.org/10.1016/j.chemosphere.2023.137971>.
- (5) Liu, Z.; Dai, X.; He, J.; Chen, W.; Wei, Y.; Zhou, Q.; Ma, D.; Zheng, X. Unraveling the thallium immobilization in CuO/PMS system. *Chem. Eng. J.* **2023**, *472*, 144869, DOI: 10.1016/j.cej.2023.144869.
- (6) López, Y. C.; Ortega, G. A.; Martínez, M. A.; Reguera, E. Magnetic Prussian blue derivative like absorbent cages for an efficient thallium removal. *J. Clean. Prod.* **2021**, *283*, 124587, DOI: 10.1016/j.jclepro.2020.124587.
- (7) Shi, Y.; Huang, L.; Mahmud, S.; Zhang, G.; Li, H.; Wang, Y.; Xiao, T.; Zeng, Q.; Liu, Z.; Yu, H.; et al. High-efficiently capturing trace thallium (I) from wastewater via the Prussian blue@polytetrafluoroethylene hybrid membranes. *Chem. Eng. J.* **2023**, *451*, 138712, DOI: 10.1016/j.cej.2022.138712.
- (8) Li, L.; Liu, C.; Ma, R.; Yu, Y.; Chang, Z.; Zhang, X.; Yang, C.; Chen, D.; Yu, Y.; Li, W.; et al. Enhanced oxidative and adsorptive removal of thallium (Tl) using Fe<sub>3</sub>O<sub>4</sub>@TiO<sub>2</sub> decorated rgo nanosheets as persulfate activator and adsorbent. *Sep. Purif. Technol.* **2021**, *271*, DOI: 10.1016/j.seppur.2021.118827.
- (9) Chen, W.; Xiong, J.; Liu, J.; Wang, H.; Yao, J.; Liu, H.; Huangfu, X.; He, Q.; Ma, J.; Liu, C.; et al. Thermodynamic and kinetic coupling modeling for thallium sorption at a heterogeneous titanium dioxide interface. *J. Hazard. Mater.* **2022**, *428*, 128230, DOI: 10.1016/j.jhazmat.2022.128230.
- (10) Chen, K.; Tzou, Y.; Hsu, L.; Guo, J.; Cho, Y.; Teah, H.; Hsieh, Y.; Liu, Y. Oxidative removal of thallium(I) using Al beverage can waste with amendments of Fe: Tl speciation and removal mechanisms. *Chem. Eng. J.* **2022**, *427*, 130846, DOI: <https://doi.org/10.1016/j.cej.2021.130846>.
- (11) Wan, S.; Song, X.; Wang, X.; Yuan, C.; Wang, B.; Chen, H.; Li, Y.; Ouyang, K.; Chen, R. Enhanced removal thallium from rinsing wastewater by poly aluminum chloride: experimental and theoretical studies. *Sep. Purif. Technol.* **2022**, *302*, 122158, DOI: <https://doi.org/10.1016/j.seppur.2022.122158>.
- (12) Fang, F.; Li, N.; Zhang, X.; Liu, J.; Beiyuan, J.; Cao, J.; Wang, J.; Liu, Y.; Song, G.; Xiao, T. Perspective on Fe<sup>0</sup>-PS synergetic effect and reaction mechanism in the thallium(I) contaminated water treatment. *Environ. Res.* **2022**, *214*, 113698, DOI: <https://doi.org/10.1016/j.envres.2022.113698>.
- (13) Huang, Y.; Liu, Z.; Liu, H.; Ma, C.; Chen, W.; Huangfu, X. Removal of thallium by MnO<sub>x</sub> coated

- limestone sand filter through regeneration of  $\text{KMnO}_4$ : combination of physiochemical and biochemical actions. *J. Hazard. Mater.* **2024**, *464*, 132947, DOI: <https://doi.org/10.1016/j.jhazmat.2023.132947>.
- (14) Tian, C.; Zhang, B.; Borthwick, A. G. L.; Li, Y.; Liu, W. Electrochemical oxidation of thallium (I) in groundwater by employing single-chamber microbial fuel cells as renewable power sources. *Int. J. Hydrog. Energy* **2017**, *42*(49), 29454-29462, DOI: <https://doi.org/10.1016/j.ijhydene.2017.10.026>.
- (15) Chao, W.; Huimin, H.; Min, C.; Junwei, H.; Lei, P.; Qian, W.; Qing, S.; Tingting, Z.; Qiwu, Z. Active ion-exchangeable  $\text{Bi}_2\text{O}(\text{OH})_2\text{SO}_4$  synthesized by ball milling for effective iodine enrichment: insight into the pathway. *J. Nucl. Mater.* **2022**, *572*, 154081, DOI: [10.1016/j.jnucmat.2022.154081](https://doi.org/10.1016/j.jnucmat.2022.154081).
- (16) Wang, C.; Hu, H.; Chen, M.; Huang, J.; Shi, Q.; Zeng, C.; Deng, Z.; Zhang, Q. Efficient stabilization of Barium- and gypsum-bearing tailings by one-step dry ball milling—an ingenious inspiration. *Sep. Purif. Technol.* **2023**, *313*, 123473, DOI: <https://doi.org/10.1016/j.seppur.2023.123473>.
- (17) Wang, C.; Hu, H.; Chen, M.; Wang, Q.; Liu, C.; Chen, M.; Yan, S.; Zhang, Q. Mechanochemical synthesis of bismuth-based anion exchange materials to immobilize arsenic pollution - prospects for advanced treatment of anion-containing wastewater. *J. Clean. Prod.* **2022**, *340*, 130747, DOI: <https://doi.org/10.1016/j.jclepro.2022.130747>.
- (18) Chakraborty, S.; Bardelli, F.; Charlet, L. Reactivities of Fe(II) on calcite: selenium reduction. *Environ. Sci. Technol.* **2010**, *44*(4), 1288-1294, DOI: [10.1021/es903037s](https://doi.org/10.1021/es903037s).
- (19) Wang, Z.; Li, J.; Yin, L.; Zhang, L.; Liu, J.; Shen, N.; Yan, S.; Guan, Q. A new procedure for separating thallium from geological materials prior to stable isotope ratio determination by MC-ICP-MS. *Chem. Geol.* **2023**, *627*, 121457, DOI: [10.1016/j.chemgeo.2023.121457](https://doi.org/10.1016/j.chemgeo.2023.121457).
- (20) Du, Y.; Shi, L.; Li, X.; Liu, J.; Ying, R.; Hu, P.; Wu, L.; Christie, P. Potential mobilization of water-dispersible colloidal thallium and arsenic in contaminated soils and sediments in mining areas of southwest china. *J. Hazard. Mater.* **2024**, *465*, 133211, DOI: [10.1016/j.jhazmat.2023.133211](https://doi.org/10.1016/j.jhazmat.2023.133211).
- (21) Chen, X.; Wang, C.; Chen, M.; Hu, H.; Huang, J.; Jiang, T.; Zhang, Q. Enhanced  $\text{Cd}^{2+}$  removal from aqueous solution using olivine and magnesite combination: new insights into the mechanochemical synergistic effect. *J. Environ. Sci.* **2025**, *147*, 714-725, DOI: <https://doi.org/10.1016/j.jes.2023.10.038>.
- (22) Hu, H.; Zhang, Q.; Wang, Q.; Chen, M.; Wang, C.; Wang, Z. Rapid mechanochemical dichlorination of hexachlorobenzene with zero-valent silicon as a novel additive: the attempt of zero-valent nonmetallic. *Journal of Environmental Chemical Engineering* **2023**, *11*(6), 111398, DOI: <https://doi.org/10.1016/j.jece.2023.111398>.
- (23) Luo, S.; Zhao, X.; Qu, Y.; Wang, L.; Zhou, B.; Si, W.; Fang, W. Insights into the full cycling of oxygen in vocs oxidation on  $\alpha\text{-MnO}_2$ : a Nap-XPS study. *Appl. Surf. Sci.* **2023**, *634*, 157506, DOI: [10.1016/j.apsusc.2023.157506](https://doi.org/10.1016/j.apsusc.2023.157506).
- (24) Fan, D.; Anitori, R. P.; Tebo, B. M.; Tratnyek, P. G.; Lezama Pacheco, J. S.; Kukkadapu, R. K.; Kovarik, L.; Engelhard, M. H.; Bowden, M. E. Oxidative remobilization of technetium sequestered by sulfide-transformed nano zerovalent iron. *Environ. Sci. Technol.* **2014**, *48*(13), 7409-7417, DOI: [10.1021/es501607s](https://doi.org/10.1021/es501607s).
- (25) Tian-Ming, G.; Na, F.; Wu, C.; Tao, D. Lithium extraction from hard rock lithium ores (spodumene, lepidolite, zinnwaldite, petalite): technology, resources, environment and cost. *China Geol.* **2023**, *6*(1), 137-153, DOI: [10.31035/cg2022088](https://doi.org/10.31035/cg2022088).
- (26) Zhou, Y.; Tang, X.; Qing, D.; Li, J.; Wang, H. Research progress of technology of lithium extraction. *Sep. Purif. Technol.* **2025**, *359*, 130561, DOI: [10.1016/j.seppur.2024.130561](https://doi.org/10.1016/j.seppur.2024.130561).
